# Supplementary material for: Effects of Different Types of Incubators on Embryo Development and Clinical Outcomes
Source: Research Square preprint supplement (doi:10.21203/rs.3.rs-122464/v1), 2020-12-09
Supplement: Supplementary file 1 [file bba4c6415305aa18ae473991.xlsx]

## Sheet: Sheet1
Characteristics of patients in this study
Age	30.88±0.57
BMI(kg/m2)	23.91±0.51
Basal E2	297.2±69.45
Basal FSH	6.53±0.46
Duration of infertility (y)	5.4±0.62
Antral follicle count(≥14mm)	10±2.22
No. of oocytes collected	23.56±1.05
No. of matured oocytes	18.6±0.65
No. of embryo transferred	1.63±0.08
